# Supplementary material for: Structural Progression in Patients with Definite and Non-Definite Arrhythmogenic Right Ventricular Cardiomyopathy and Risk of Major Adverse Cardiac Events
Source: MDPI journal article supplement (doi:10.3390/biomedicines12020328), 2024-01-31
Supplement: s1 [file s1]

### Supplementary Online Content

**Table S1.** Clinical and demographic biomarkers of stable and progressive structural disease

**Table S2.** Electrical and imaging characteristics of stable and progressive structural disease

**Table S3.** Structural and electrical progression over time in stable and progressive structural disease

**Table S4.** 2010 TFC and Major adverse cardiac events at baseline and during follow-up in stable and progressive structural disease

**Table S5.** Structural progression over time between gene positive and gene negative patients

**Table S6.** Clinical and demographic biomarkers of patients with and without pathogenic variant

**Table S7.** Structural progression over time between patients with *PKP2* and *DSP* variants

**Table S8.** Baseline imaging characteristics between patients with *PKP2* and *DSP* variants

**Table S9.** Definite ARVC patients (n=15) with Epsilon wave classified as minor criterion per 2020 Criteria"

This supplementary material has been provided by the authors to give readers additional information about their work.

**Table S1.** Clinical and demographic biomarkers of stable and progressive structural disease

| Clinical characteristics at baseline          | Stable disease<br>(n = 28) | Progressive structural<br>disease (n = 23) | p value      |
|-----------------------------------------------|----------------------------|--------------------------------------------|--------------|
| Age (years), n (%)                            | 42 ± 14                    | 43 ± 18                                    | 0.834        |
| Male gender, n (%)                            | 13 (46%)                   | 21 (91%)                                   | <b>0.001</b> |
| BSA (m²)                                      | 1.9 ± 0.3                  | 2.0 ± 0.2                                  | 0.143        |
| Ethnicity                                     |                            |                                            |              |
| White, n (%)                                  | 17 (61%)                   | 15 (65%)                                   | 0.291        |
| Asian, n (%)                                  | 3 (11%)                    | 5 (22%)                                    |              |
| Black, n (%)                                  | 2 (7%)                     | 2 (9%)                                     |              |
| Non-specified/mixed, n (%)                    | 6 (21%)                    | 1 (4%)                                     |              |
| Identification of a pathogenic variant, n (%) | 20 (80%)                   | 14 (64%)                                   | 0.328        |
| Symptoms                                      |                            |                                            |              |
| Palpitation, n (%)                            | 14 (50%)                   | 16 (70%)                                   | 0.253        |
| Syncope, n (%)                                | 7 (25%)                    | 14 (61%)                                   | <b>0.012</b> |
| History of sport                              |                            |                                            |              |
| Competitive sport, n (%)                      | 5 (19%)                    | 10 (45%)                                   | 0.113        |
| Non-competitive sport, n (%)                  | 8 (31%)                    | 3 (14%)                                    |              |
| Biomarkers                                    |                            |                                            |              |
| NT-proBNP (ng/L)                              | 491 (132, 753)             | 431 (273, 478)                             | 0.943        |

Abbreviations: BSA: body surface area; NT-proBNP: N-terminal pro-B-type natriuretic peptide. Data are reported as mean ±SD, with p-values from independent samples t-tests; median (IQR), with p-values from Mann-Whitney U tests; or as n: number (%), with p-values from Fisher's exact tests.

**Table S2.** Electrical and imaging characteristics of stable and progressive structural disease

| Baseline ECG                        | Stable disease<br>(n = 28) | Progressive structural disease<br>(n = 23) | p value      |
|-------------------------------------|----------------------------|--------------------------------------------|--------------|
| Heart rate (bpm)                    | 65 (54, 76)                | 59 (53, 79)                                | 0.917        |
| PR interval (ms)                    | 159 (138, 183)             | 166 (148, 190)                             | 0.353        |
| QRS duration (ms)                   | 98 (86, 106)               | 104 (88, 114)                              | 0.244        |
| QT (ms)                             | 418 ± 43                   | 422 ± 43                                   | 0.745        |
| QTc (ms)                            | 426 ± 31                   | 422 ± 27                                   | 0.697        |
| P axes                              | 56 ± 16                    | 50 ± 18                                    | 0.221        |
| QRS axes                            | 39 ± 44                    | 34 ± 59                                    | 0.732        |
| T axes                              | 27 (-10, 52)               | 15 (-7, 47)                                | 0.532        |
| Major ECG depolarisation, n (%)     | 4 (14%)                    | 8 (35%)                                    | 0.107        |
| Minor ECG depolarisation, n (%)     | 14 (64%)                   | 11 (65%)                                   | 1.000        |
| Major ECG repolarisation, n (%)     | 18 (64%)                   | 10 (36%)                                   | 0.166        |
| Minor ECG repolarisation, n (%)     | 10 (36%)                   | 12 (52%)                                   | 0.269        |
| >500 PVC / 24 hours (Holter), n (%) | 9 (64%)                    | 10 (77%)                                   | 0.678        |
| <b>Echo</b>                         |                            |                                            |              |
| RVOT-PLAX (cm)                      | 3.3 ± 0.9                  | 3.4 ± 0.8                                  | 0.586        |
| RVOT-PSAX (cm)                      | 3.5 ± 0.8                  | 3.5 ± 0.7                                  | 0.809        |
| RV-base (cm)                        | 3.9 ± 0.9                  | 4.5 ± 0.9                                  | <b>0.015</b> |
| RV-mid (cm)                         | 3.0 (2.7, 4.0)             | 3.7 (3.1, 4.7)                             | <b>0.037</b> |
| RV-EDA (cm <sup>2</sup> )           | 22 (17, 28)                | 28 (19, 33)                                | 0.081        |
| RV-FAC (%)                          | 39 ± 13                    | 35 ± 8                                     | 0.343        |
| LV-EDV (ml)                         | 91 ± 28                    | 94 ± 36                                    | 0.793        |
| LV-EF (%)                           | 61 (59, 65)                | 56 (42, 60)                                | <b>0.003</b> |
| <b>CMR</b>                          |                            |                                            |              |
| RV-EDV (ml)                         | 188 (128, 228)             | 194 (159, 255)                             | 0.229        |
| RV-EF (%)                           | 44 ± 17                    | 34 ± 10                                    | <b>0.038</b> |
| LV-EDV (ml)                         | 132 (120, 187)             | 156 (127, 219)                             | 0.282        |
| LV-EF (%)                           | 61 ± 18                    | 52 ± 14                                    | 0.106        |
| LGE present, n (%)                  | 11 (55%)                   | 10 (71%)                                   | 0.477        |

Abbreviations: HR: heart rate; premature ventricular contractions; RVOT PLAX: right ventricular outflow tract parasternal long axis; RVOT PSAX: right ventricular outflow tract parasternal short axis; RVEDA: right ventricular end diastolic area; RVFAC: right ventricular fractional area change; LVEDV: left ventricular end-diastolic volume; LV EF: left ventricular ejection fraction; LGE: late gadolinium enhancement. Data are reported as mean±SD, with p-values from independent samples t-tests; median (IQR), with p-values from Mann-Whitney tests; or n: number (%), with p-values from Fisher's exact tests.

**Table S3.** Structural and electrical progression over time in stable and progressive structural disease

| Markers          | Gradient per year          |              |                                            |                  | Interaction<br>p value |
|------------------|----------------------------|--------------|--------------------------------------------|------------------|------------------------|
|                  | Stable disease<br>(n = 28) |              | Progressive structural disease<br>(n = 23) |                  |                        |
|                  | Statistics (95%CI)         | p-value      | Statistics (95%CI)                         | p-value          |                        |
| RVOT-PLAX (cm)   | 0.04 (0.01, 0.1)           | <b>0.003</b> | 0.1 (1, 0.2)                               | <b>&lt;0.001</b> | <b>0.001</b>           |
| RVOT-PSAX (cm)   | 0.03 (-0.00, 0.1)          | 0.092        | 0.12 (0.1, 0.2)                            | <b>&lt;0.001</b> | <b>0.004</b>           |
| RV-base (cm)     | 0.02 (-0.02, 0.1)          | 0.378        | 0.1 (-0.01, 0.12)                          | 0.069            | 0.319                  |
| RV-mid (cm)      | -0.01 (-0.1, 0.1)          | 0.812        | 0.04 (-0.01, 0.1)                          | 0.139            | 0.213                  |
| RV-EDA (cm²)     | 0.11 (-0.3, 1)             | 0.620        | 1 (0.4, 2)                                 | <b>0.001</b>     | <b>0.018</b>           |
| RV-FAC (%)       | -0.5 (-1.10, 0.13)         | 0.124        | -1 (-2, -0.2)                              | <b>0.011</b>     | 0.336                  |
| LV-EDV (ml)      | -2 (-4, -0.1)              | <b>0.042</b> | 4 (1.4, 6.4)                               | <b>0.002</b>     | <b>&lt;0.001</b>       |
| LV-EF (%)        | -0.2 (-0.72, 0.32)         | 0.451        | 1 (-0.30, 2)                               | 0.183            | 0.126                  |
| HR (bpm)         | 0.5 (-3.4, 4.0)            | 0.682        | 0.0 (-4, 3)                                | 0.394            | 0.320                  |
| PR interval (ms) | 1.1 (-4.2, 6)              | 0.554        | 5 (0.3, 12)                                | <b>0.011</b>     | 0.130                  |
| QRS dur (ms)     | 1 (-2, 3)                  | 0.439        | 2 (0.0, 8)                                 | <b>0.005</b>     | 0.087                  |

Abbreviations: RVOT PLAX: right ventricular outflow tract parasternal long axis; RVOT PSAX: right ventricular outflow tract parasternal short axis; RVEDA: right ventricular end diastolic area; RVFAC: right ventricular fractional area change; LVEDV: left ventricular end-diastolic volume; LVEF: left ventricular ejection fraction; HR: heart rate. Longitudinal trends were analysed using a generalized estimating equation approach.

**Table S4.** 2010 TFC and Major adverse cardiac events at baseline and during follow-up in stable and progressive structural disease

|                                          | Stable disease (n = 28) |                  |         |    | Progressive structural disease (n =23) |                  |              |    |
|------------------------------------------|-------------------------|------------------|---------|----|----------------------------------------|------------------|--------------|----|
|                                          | At baseline             | During follow-up | p value | *n | At baseline                            | During follow-up | p value      | *n |
| Major ECG depolarisation, n (%)          | 4 (14%)                 | 5 (18%)          | 1.000   | 28 | 8 (35%)                                | 10 (43%)         | 0.500        | 23 |
| Minor ECG depolarisation, n (%)          | 10 (63%)                | 11 (69%)         | 1.000   | 16 | 5 (50%)                                | 6 (60%)          | 1.000        | 10 |
| Major ECG repolarisation, n (%)          | 18 (64%)                | 18 (64%)         | 1.000   | 28 | 10 (43%)                               | 11 (48%)         | 1.000        | 23 |
| Minor ECG repolarisation, n (%)          | 10 (36%)                | 14 (50%)         | 0.125   | 28 | 12 (52%)                               | 14 (61%)         | 0.625        | 23 |
| >500 PVC / 24 hours (Holter)             | 6 (67%)                 | 5 (56%)          | 1.000   | 9  | 5 (83%)                                | 5 (83%)          | 1.000        | 6  |
| Ventricular fibrillation, n (%), n (%)   | 2 (7%)                  | 0 (100%)         | 0.500   | 28 | 6 (26%)                                | 0 (0%)           | <b>0.031</b> | 23 |
| Sustained ventricular tachycardia, n (%) | 7 (25%)                 | 1 (4%)           | 0.070   | 28 | 5 (22%)                                | 3 (13%)          | 0.727        | 23 |
| Heart failure, n (%)                     | 2 (7%)                  | 1 (4%)           | 1.000   | 28 | 0 (0%)                                 | 4 (17%)          | 0.125        | 23 |
| ICD implanted, n (%)                     | 4 (14%)                 | 11 (39%)         | 0.118   | 28 | 8 (35%)                                | 10 (43%)         | 0.815        | 23 |
| ICD therapy (shock/ATP), n (%)           | 1 (4%)                  | 3 (11%)          | 0.625   | 28 | 4 (17%)                                | 9 (39%)          | 0.267        | 23 |

Data are reported as n: number (%), with p-values from McNemar's test. \*n represent the number of cases present at baseline and during follow-up.

**Table S5.** Structural progression over time between gene positive and gene negative patients

| Markers        | Gradient per year measured over 4 years       |                  |                                                  |              | Interaction<br>p-value |
|----------------|-----------------------------------------------|------------------|--------------------------------------------------|--------------|------------------------|
|                | Patients with pathogenic<br>variants (n = 66) |                  | Patients with no pathogenic<br>variants (n = 31) |              |                        |
|                | Statistics (95% CI)                           | p-value          | Statistics (95% CI)                              | p-value      |                        |
| RVOT-PLAX (cm) | 0.04 (0.02, 0.1)                              | <b>&lt;0.001</b> | 0.1 (0.01, 0.1)                                  | <b>0.015</b> | 0.721                  |
| RVOT-PSAX (cm) | 0.03 (0.01, 0.1)                              | 0.004            | 0.04 (-0.01, 0.10)                               | 0.122        | 0.722                  |
| RV-FAC (%)     | -0.4 (-1, 0.1)                                | 0.106            | -1 (-2, 0.3)                                     | 0.175        | 0.619                  |
| LV-EF (%)      | -0.04 (-0.5, 0.4)                             | 0.834            | 0.2 (-1, 1)                                      | 0.656        | 0.624                  |

Abbreviations: RVOT PLAX: right ventricular outflow tract parasternal long axis; RVOT PSAX: right ventricular outflow tract parasternal short axis; RVFAC: right ventricular fractional area change; LVEF: left ventricular ejection fraction. Longitudinal trends were analysed using a generalized estimating equation approach.

**Table S6.** Clinical and demographic biomarkers of patients with and without pathogenic variant

| Demographic                          | Total<br>(n= 97) | Patients with<br>pathogenic<br>variants (n = 66) | Patients with no<br>pathogenic<br>variants (n = 31) | p value |
|--------------------------------------|------------------|--------------------------------------------------|-----------------------------------------------------|---------|
| Age (years)                          | 38 (27, 53)      | 39 (30, 52)                                      | 45 (22, 56)                                         | 0.868   |
| Male sex, n (%)                      | 56 (58%)         | 30 (45%)                                         | 26 (84%)                                            | <0.001  |
| BSA, (m²)                            | 1.9 (1.7, 2.0)   | 1.8 (1.7, 2.0)                                   | 2.0 (1.8, 2.2)                                      | 0.014   |
| Type of pathogenic variant, 66 (68%) |                  |                                                  |                                                     |         |
| PKP2, n (%)                          | 39 (40%)         | 39 (59%)                                         | 0 (0%)                                              | -       |
| DSP, n (%)                           | 21 (22%)         | 21 (32%)                                         | 0 (0%)                                              | -       |
| DSG2, n (%)                          | 3 (3%)           | 3 (5%)                                           | 0 (0%)                                              | -       |
| DSC2, n (%)                          | 3 (3%)           | 3 (5%)                                           | 0 (0%)                                              | -       |
| Ethnicity                            |                  |                                                  |                                                     |         |
| White, n (%)                         | 61 (63%)         | 48 (73%)                                         | 13 (42%)                                            | 0.017   |
| Asian, n (%)                         | 11 (11%)         | 4 (6%)                                           | 7 (23%)                                             |         |
| Black, n (%)                         | 4 (4%)           | 3 (5%)                                           | 1 (3%)                                              |         |
| Non-specified/mixed, n (%)           | 21 (22%)         | 11 (17%)                                         | 10 (32%)                                            |         |
| Symptoms                             |                  |                                                  |                                                     |         |
| Palpitation, n (%)                   | 38 (39%)         | 26 (39%)                                         | 12 (39%)                                            | 1.000   |
| Syncope, n (%)                       | 22 (23%)         | 12 (18%)                                         | 10 (32%)                                            | 0.192   |
| Medication                           |                  |                                                  |                                                     |         |
| Statins, n (%)                       | 3 (3%)           | 0 (0%)                                           | 3 (10%)                                             | 0.030   |
| Anticoagulant, n (%)                 | 6 (6%)           | 3 (5%)                                           | 3 (10%)                                             | 0.380   |
| Antiarrhythmic drugs, n (%)          | 15 (15%)         | 9 (14%)                                          | 6 (19%)                                             | 0.550   |
| Beta blocker, n (%)                  | 22 (23%)         | 16 (24%)                                         | 6 (19%)                                             | 0.795   |

Abbreviations: BSA: body surface area. Data are reported as median (IQR), with p-values from Mann-Whitney U tests; or as n: number (%), with p-values from Fisher's exact tests.

**Table S7.** Structural progression over time between patients with *PKP2* and *DSP* variants

| Markers        | Gradient per year measured over 4 years       |              |                                              |         | Interaction<br>p-value |
|----------------|-----------------------------------------------|--------------|----------------------------------------------|---------|------------------------|
|                | Patients with <i>PKP2</i> variant<br>(n = 39) |              | Patients with <i>DSP</i> variant<br>(n = 21) |         |                        |
|                | Statistics (95% CI)                           | p-value      | Statistics (95% CI)                          | p-value |                        |
| RVOT-PLAX (cm) | 0.03 (0.005, 0.05)                            | <b>0.020</b> | 0.04 (-0.003, 0.08)                          | 0.067   | 0.765                  |
| RVOT-PSAX (cm) | 0.03 (0.001, 0.06)                            | <b>0.043</b> | 0.01 (-0.04, 0.06)                           | 0.704   | 0.474                  |
| RV-FAC (%)     | -0.4 (-0.9, 0.1)                              | 0.122        | -0.2 (-1.4, 0.9)                             | 0.697   | 0.782                  |
| LV-EF (%)      | -0.2 (-0.6, 0.2)                              | 0.290        | 0.2 (-0.6, 1)                                | 0.684   | 0.423                  |

Abbreviations: RVOT PLAX: right ventricular outflow tract parasternal long axis; RVOT PSAX: right ventricular outflow tract parasternal short axis; LV EF: left ventricular ejection fraction. Longitudinal trends were analysed using a generalized estimating equation approach.

**Table S8.** Baseline imaging characteristics between patients with *PKP2* and *DSP* variants

| Imaging characteristics         | Patients with <i>PKP2</i> variant (n =39) | Patients with <i>DSP</i> variant (n=21) | p value      |
|---------------------------------|-------------------------------------------|-----------------------------------------|--------------|
| <b>Echo data</b>                |                                           |                                         |              |
| RVOT-PLAX (cm)                  | 2.9 (2.4 - 3.4)                           | 2.7 (2.5 - 3.0)                         | 0.340        |
| RVOT-PSAX (cm)                  | 3.0 (2.6 - 3.6)                           | 3.0 (2.9 - 3.3)                         | 0.726        |
| RVEDA (cm2)                     | 22 ± 7                                    | 18 ± 6                                  | 0.063        |
| RV FAC (%)                      | 44 (35-48)                                | 48 (42-50)                              | 0.129        |
| LVEDV (ml)                      | 89 ± 28                                   | 99 ± 36                                 | 0.309        |
| LV EF (%)                       | 65 (59-67)                                | 59 (55-66)                              | 0.075        |
| <b><sup>a</sup>CMR data</b>     |                                           |                                         |              |
| RVEDV (ml)                      | 155 (137-197)                             | 183 (120-200)                           | 0.568        |
| RV EF (%)                       | 48 ± 13                                   | 46 ± 16                                 | 0.779        |
| LVEDV (ml)                      | 142 ± 38                                  | 189 ± 44                                | <b>0.014</b> |
| LV EF (%)                       | 65 ± 10                                   | 53 ± 15                                 | <b>0.041</b> |
| <sup>b</sup> LGE present, n (%) | 10 (37%)                                  | 6 (60%)                                 | 0.274        |

|                          |         |         |              |
|--------------------------|---------|---------|--------------|
| RV and LV LGE, n (%)     | 1 (4%)  | 5 (50%) | <b>0.003</b> |
| LV - specific LGE, n (%) | 2 (7%)  | 1 (10%) | 1.000        |
| RV - specific LGE, n (%) | 7 (26%) | 0 (0%)  | 0.155        |

Abbreviations: RVOT PLAX: right ventricular outflow tract parasternal long axis; RVOT PSAX: right ventricular outflow tract parasternal short axis; RVEDA: right ventricular end diastolic area; RVFAC: right ventricular fractional area change; LVEDD: left ventricular end-diastolic volume; LVEF: left ventricular ejection fraction; LGE: late gadolinium enhancement. Data are reported as mean±SD, with p-values from independent samples t-tests; median (IQR), with p-values from Mann-Whitney U tests; or as n: number (%), with p values from Fisher's exact tests. a CMR was performed in 28 patients (28 PKP2 carriers and 10 DSP carriers.). b LGE was assessed in 37 patients (27 PKP2 carriers and 10 DSP carriers).

**Table S9.** Definite ARVC patients (n=15) with Epsilon wave classified as minor criterion per "2020 Criteria"

| Patients  | Criteria                                                                                                                                                             | Diagnosis  |
|-----------|----------------------------------------------------------------------------------------------------------------------------------------------------------------------|------------|
| Patient 1 | -1 major imaging<br>-1 minor depolarisation, (epsilon wave)<br>-1 minor depolarisation<br>- 1 major arrhythmias<br>- 1 major family history                          | Definite   |
| Patient 2 | -1 major imaging<br>-1 minor depolarisation, (epsilon wave)<br>-1 major repolarisation<br>-1 minor repolarisation<br>-1 major arrhythmias                            | Definite   |
| Patient 3 | -1 minor imaging<br>-1 minor depolarisation, (epsilon wave)<br>-1 minor repolarisation                                                                               | Borderline |
| Patient 4 | -1 major imaging<br>-1 minor depolarisation, (epsilon wave)<br>-1 minor depolarisation<br>-1 major repolarisation<br>-2 minor arrhythmias<br>-1 major family history | Definite   |
| Patient 5 | -1 major imaging<br>-1 minor depolarisation, (epsilon wave)<br>-1 minor depolarisation<br>-1 major repolarisation<br>1 minor arrhythmias                             | Definite   |
| Patient 6 | -1 major imaging<br>-1 minor depolarisation, (epsilon wave)<br>-1 major repolarisation<br>-1 minor arrhythmias<br>-1 major family history                            | Definite   |
| Patient 7 | -1 major imaging<br>-1 minor depolarisation, (epsilon wave)<br>-1 minor depolarisation                                                                               | Definite   |



|                         |                                                                                                                                                                      |          |
|-------------------------|----------------------------------------------------------------------------------------------------------------------------------------------------------------------|----------|
|                         | -1 major repolarisation<br>-1 minor repolarisation<br>-1 major arrhythmias<br>-1 major family history                                                                |          |
| Patient 8               | -1 major imaging<br>-1 minor depolarisation, (epsilon wave)<br>-1 major repolarisation<br>-1 major arrhythmias                                                       | Definite |
| Patient 9               | -1 major imaging<br>-1 minor depolarisation, (epsilon wave)<br>-1 minor depolarisation<br>-1 minor repolarisation<br>-1 major arrhythmias<br>-1 major family history | Definite |
| Patient 10              | -1 minor depolarisation, (epsilon wave)<br>-1 major repolarisation<br>-1 major arrhythmias<br>-1 major family history                                                | Definite |
| Patient 11              | -1 major imaging<br>-1 minor depolarisation, (epsilon wave)<br>-1 minor repolarisation<br>-1 major arrhythmias<br>-1 major family history                            | Definite |
| Patient 12              | -1 major imaging<br>-1 minor depolarisation, (epsilon wave)<br>-1 minor depolarisation<br>-1 minor repolarisation<br>-1 minor arrhythmias<br>-1 minor family history | Definite |
| <sup>a</sup> Patient 13 | -1 major imaging<br>-1 minor depolarisation, (late potential)<br>-1 major repolarisation<br>-1 major family history                                                  | Definite |
| <sup>a</sup> Patient 14 | -1 major imaging<br>-1 minor depolarisation, (late potential)<br>-1 major repolarisation                                                                             | Definite |
| <sup>a</sup> Patient 15 | -1 minor imaging<br>-1 minor repolarisation<br>-1 minor arrhythmias<br>-1 major family history                                                                       | Definite |

<sup>a</sup> Patients developed Epsilon wave during follow up.

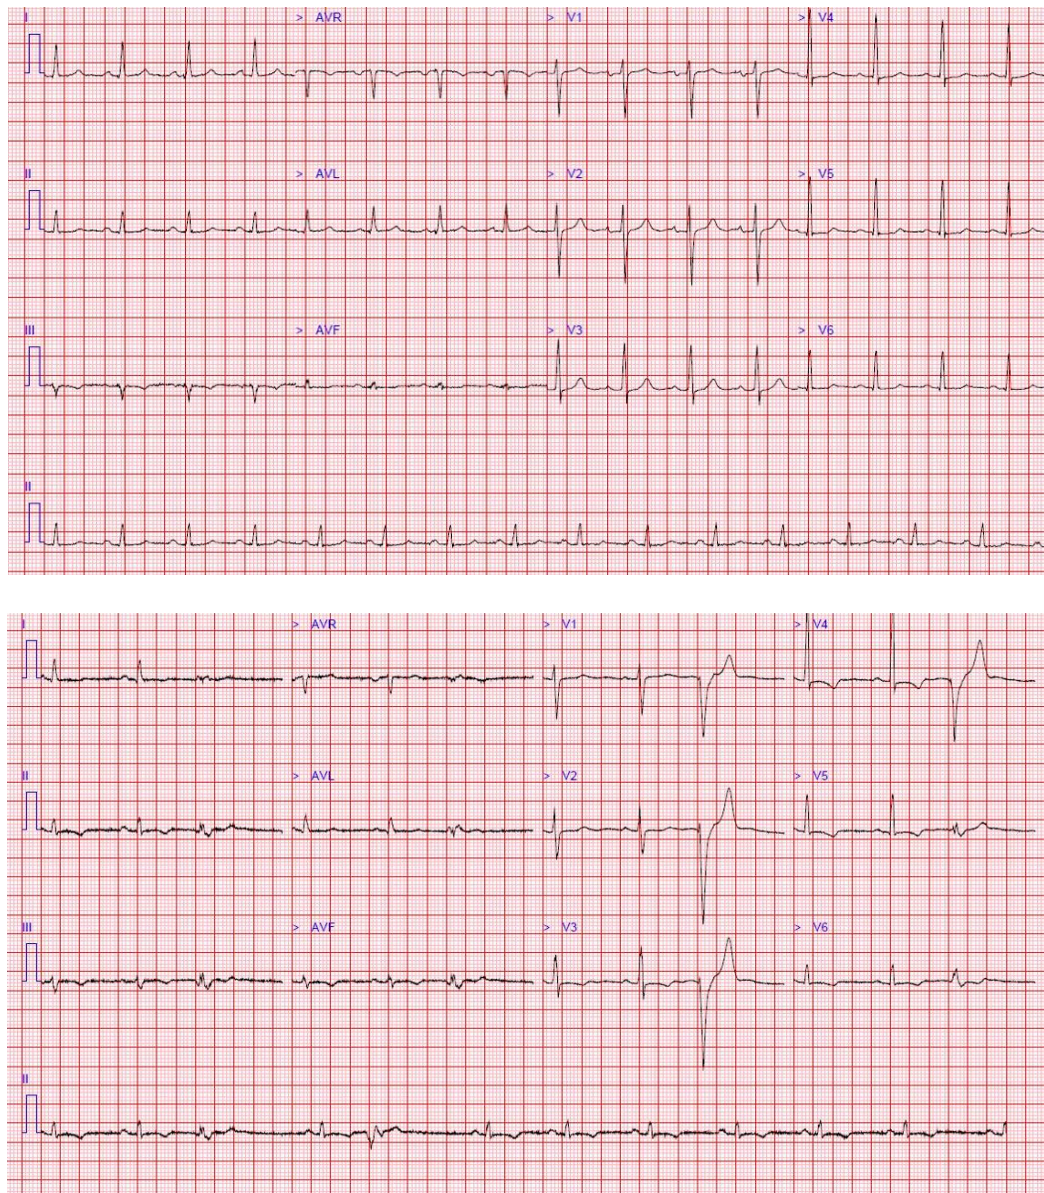

**Figure S1.** Original baseline and follow up ECG of a pathogenic variant carrier. A 35 year-old female with a *DSP* variant, presented with normal 12 lead ECG (top). During follow-up the patient gained minor repolarisation criteria (T-wave inversion in leads V4-V6, bottom). The patient was known to have premature ventricular contractions (PVC) during the initial 24 Holter monitoring already. PVCs were seen on the follow up ECG (bottom) and a high number of PVCs were seen on the follow up Holter as well.
